# Supplementary material for: Nanostructured porous wires of iron cobaltite: novel positive electrode for high-performance hybrid energy storage devices
Source: Royal Society of Chemistry journal article supplement (doi:10.1039/c5ta02701b), 2015-01-01
Supplement: c5ta02701b1.pdf [file c5ta02701b1.pdf]

## Supporting Information

### **Nanostructured Porous Wires of Iron Cobaltite: Novel Positive Electrode for High-Performance Hybrid Energy Storage Devices**

Afshin Pendashteh,<sup>\*†</sup> Jesus Palma,<sup>†</sup> Marc Anderson,<sup>†‡</sup> Rebeca Marcilla<sup>†</sup>

<sup>†</sup> Electrochemical Processes Unit, IMDEA Energy Institute, Parque Tecnológico de Móstoles, Avda. Ramón de la Sagra, 3, 28935 Móstoles, Madrid, Spain

<sup>‡</sup> Environmental Chemistry and Technology Program, University of Wisconsin, Madison, WI 53706, USA

E-mail: [afshin.pendashteh@imdea.org](mailto:afshin.pendashteh@imdea.org)

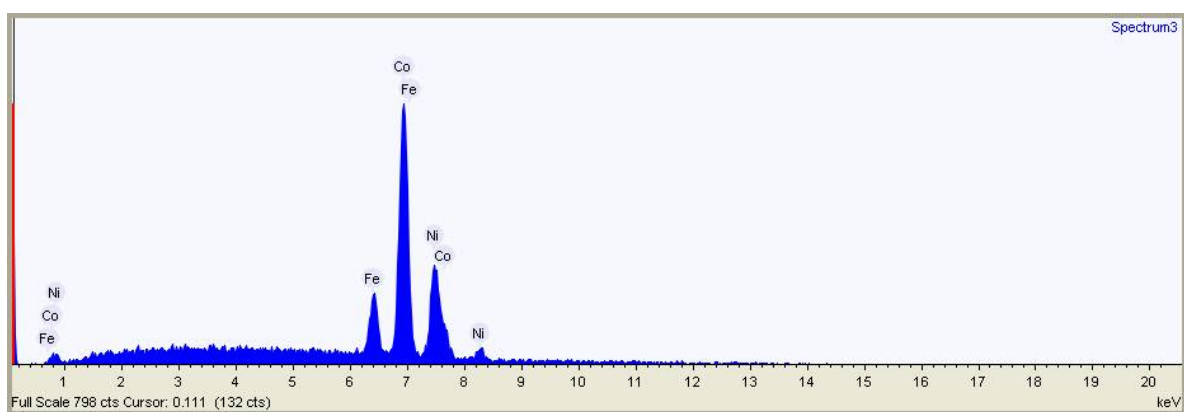

**Figure S1.** EDX spectrum of the nanostructured  $\text{FeCo}_2\text{O}_4$  micro-wires.

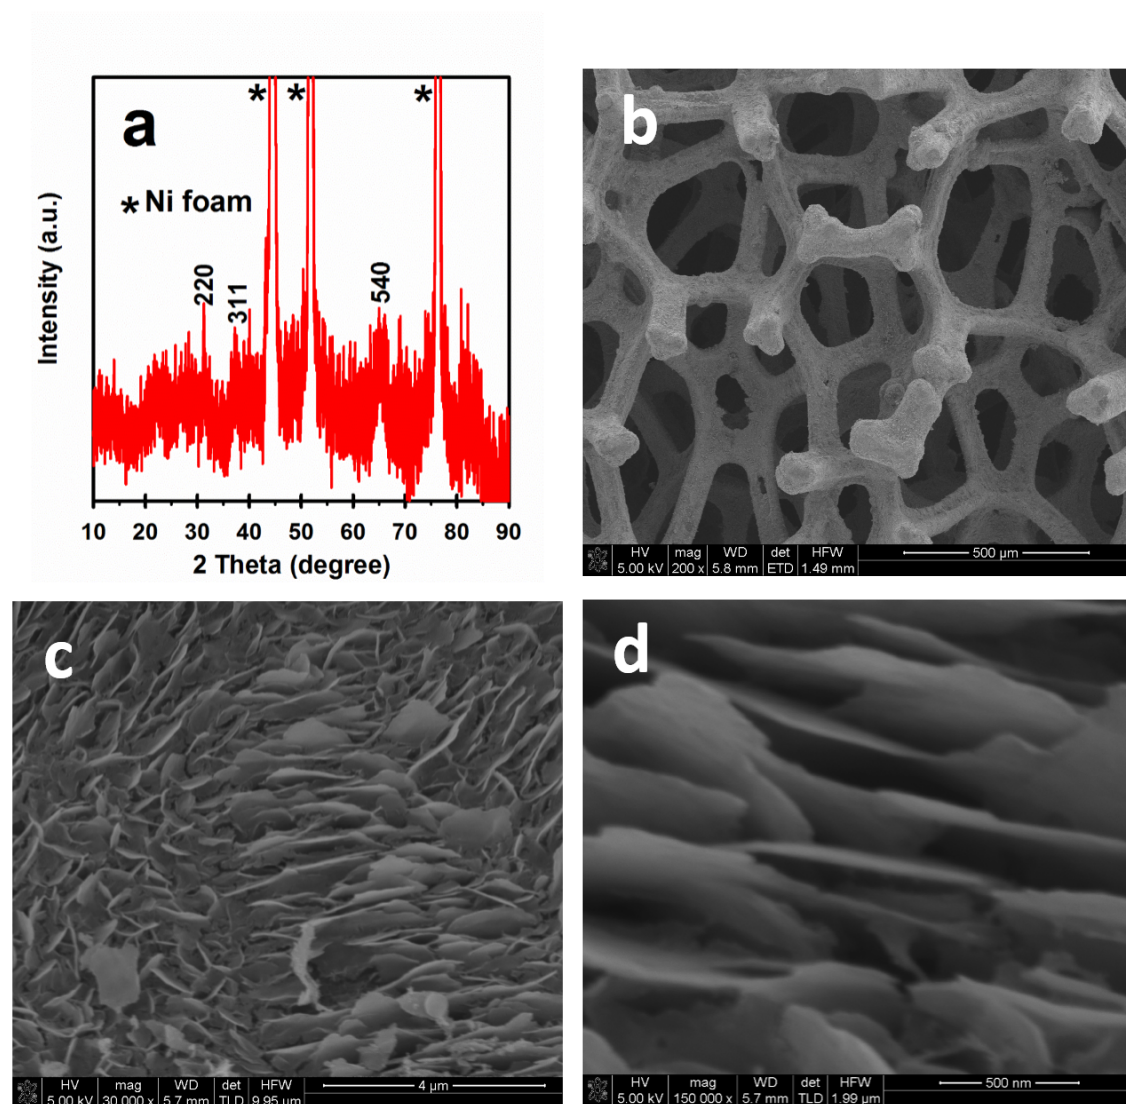

**Figure S2.** (a) XRD pattern and (b-d) SEM images of the Co<sub>3</sub>O<sub>4</sub> nano-flakes at different magnifications.

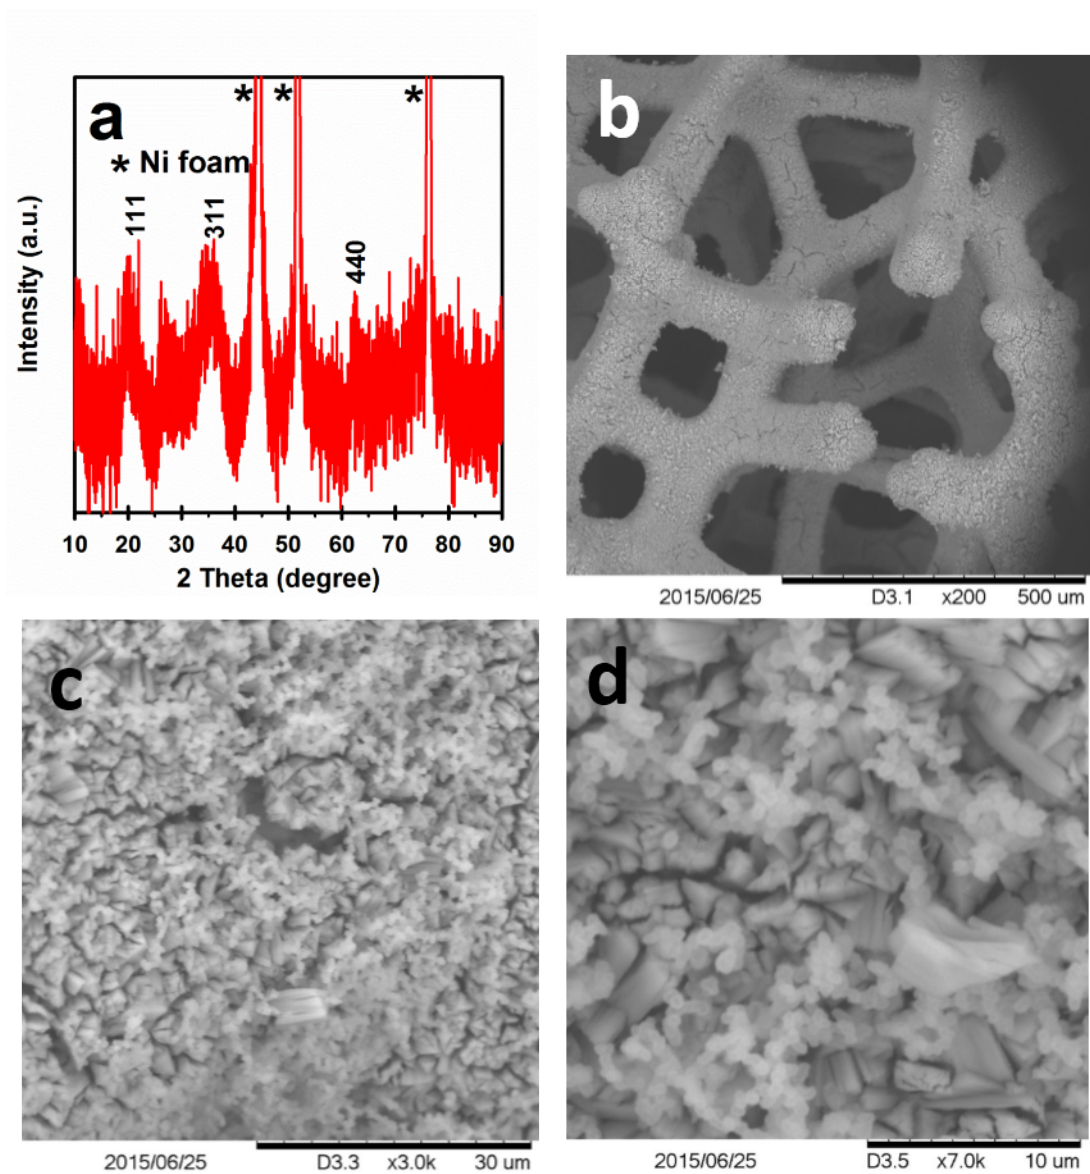

**Figure S3.** (a) XRD pattern and (b-d) SEM images of the Fe<sub>3</sub>O<sub>4</sub> sample at different magnifications.

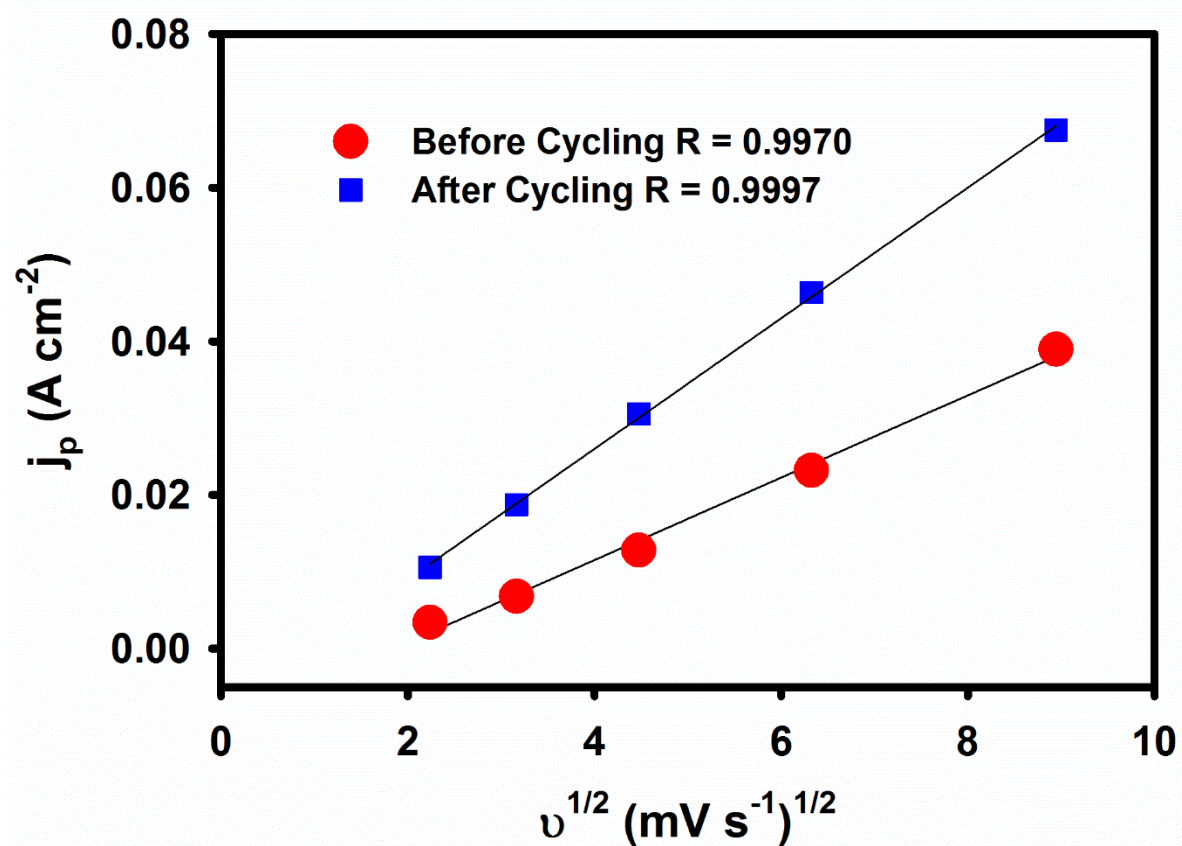

**Figure S4.** Relationship between the anodic peak current density and square root of scan rate for the nanostructured  $\text{FeCo}_2\text{O}_4$  micro-wires before and after electro-activation by cycling.

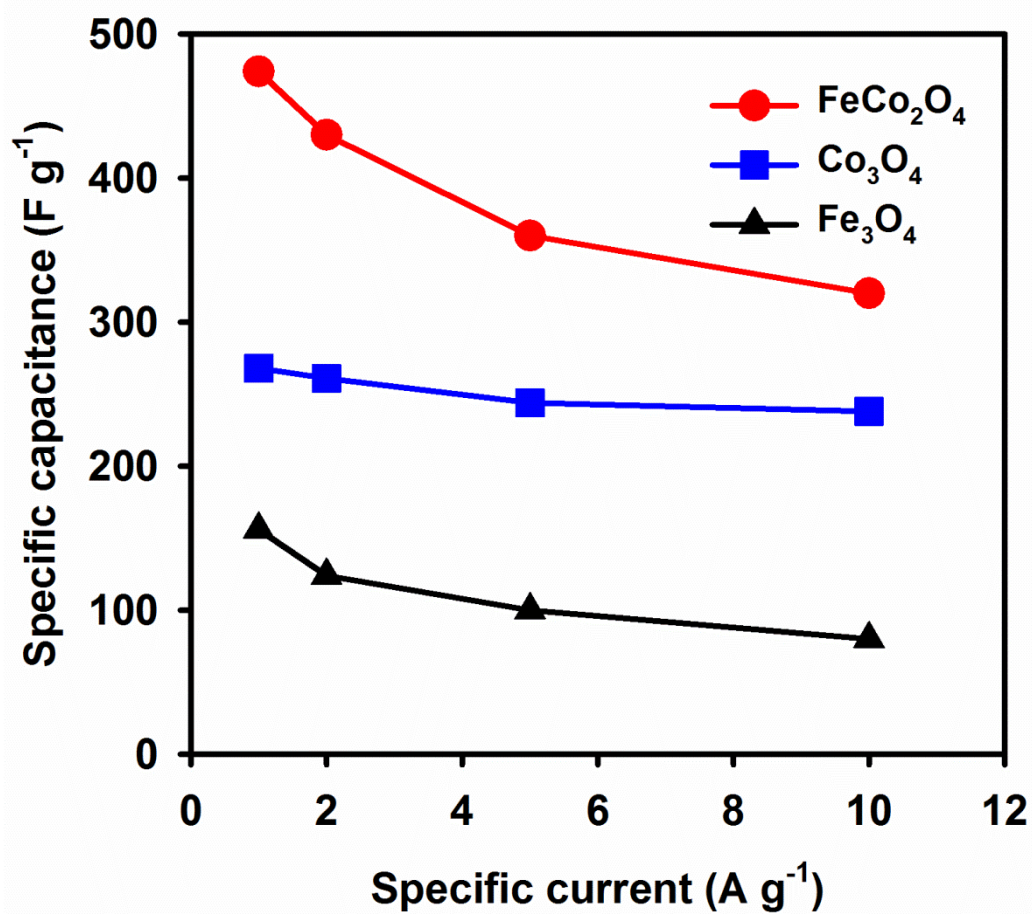

Figure S5. Rate capability of the samples at various specific currents.



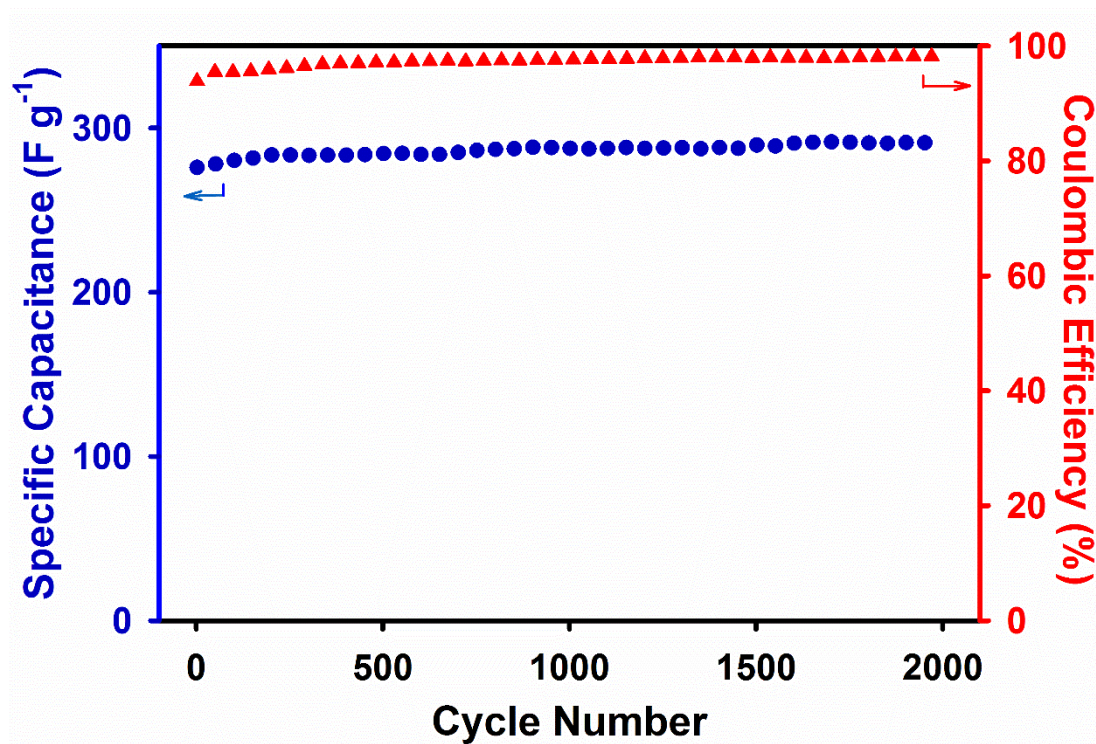

**Figure S6.** Cycling and efficiency performance of the  $\text{Co}_3\text{O}_4$  nano-flakes at the scan rate of  $10 \text{ mV s}^{-1}$ .

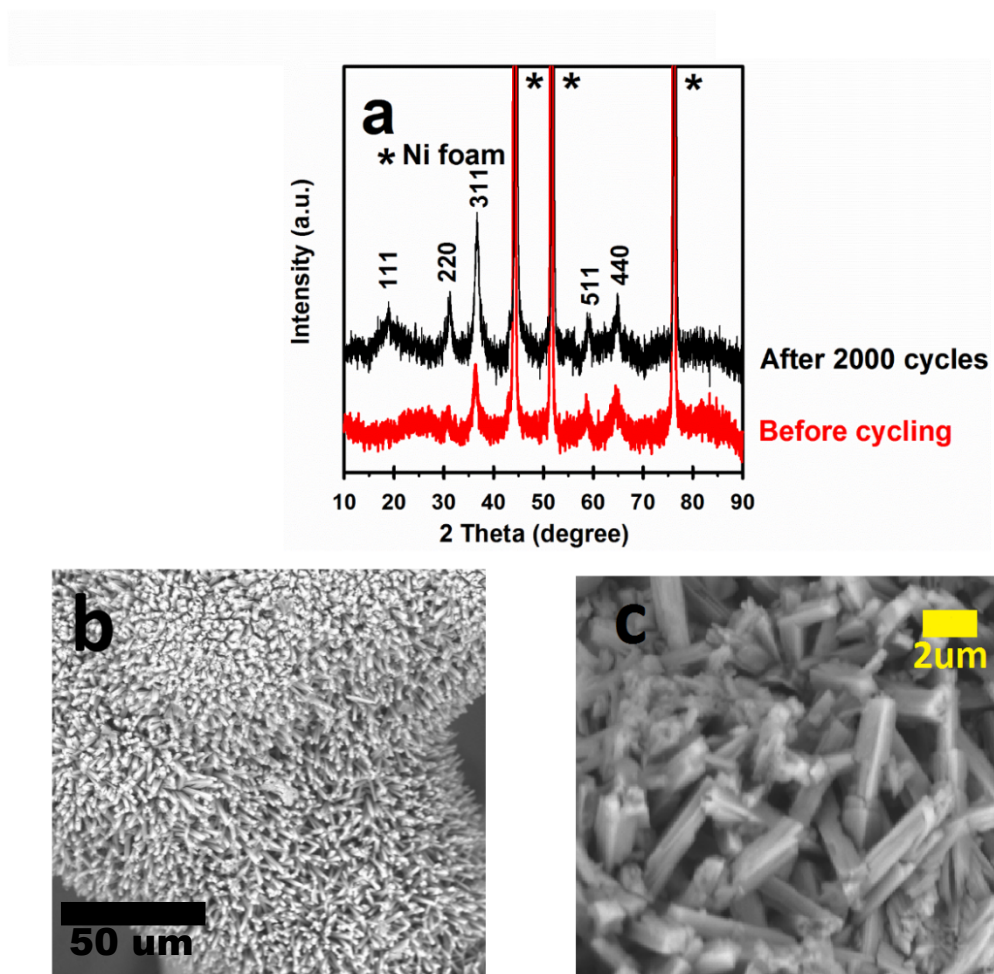

**Figure S7.** (a) XRD patterns of the nanostructured FeCo<sub>2</sub>O<sub>4</sub> micro-wires before and after 2000 cycles. (b, c) SEM images of the FeCo<sub>2</sub>O<sub>4</sub> sample after cycling at different magnifications.
